# Supplementary material for: Electrochemical oxidation of catechol in the presence of cyclopentadiene. Investigation of electrochemically induced Diels–Alder reactions
Source: Royal Society of Chemistry journal article supplement (doi:10.1039/b516814g), 2006-01-01

**Electrochemical Oxidation of Catechol in the Presence of Cyclopentadiene.  
Investigation of Electrochemically Induced Diels-Alder Reactions.**

Davood Nematollahi,<sup>†\*</sup> Mark S. Workentin,<sup>‡</sup> and Esmail Tammari,<sup>†</sup>

<sup>†</sup>*Department of Chemistry, Faculty of Science, University of Bu-Ali-Sina,  
Hamadan, 65174, Iran.*

<sup>‡</sup>*Department of Chemistry, The University of Western Ontario, London, ON N6A 5B7,  
Canada*

[nemat@basu.ac.ir](mailto:nemat@basu.ac.ir)

**supplementary Information**

**Table of Contents:**

|    |                                              |        |
|----|----------------------------------------------|--------|
| 1. | <sup>1</sup> H NMR spectrum.....             | Page 2 |
| 2. | <sup>1</sup> H NMR– expanded spectrum 1..... | Page 3 |
| 3. | <sup>1</sup> H NMR– expanded spectrum 2..... | Page 4 |
| 4. | <sup>13</sup> C NMR spectrum .....           | Page 5 |
| 5. | M.S spectrum .....                           | Page 6 |
| 6. | M.S- expanded spectrum 1.....                | Page 7 |

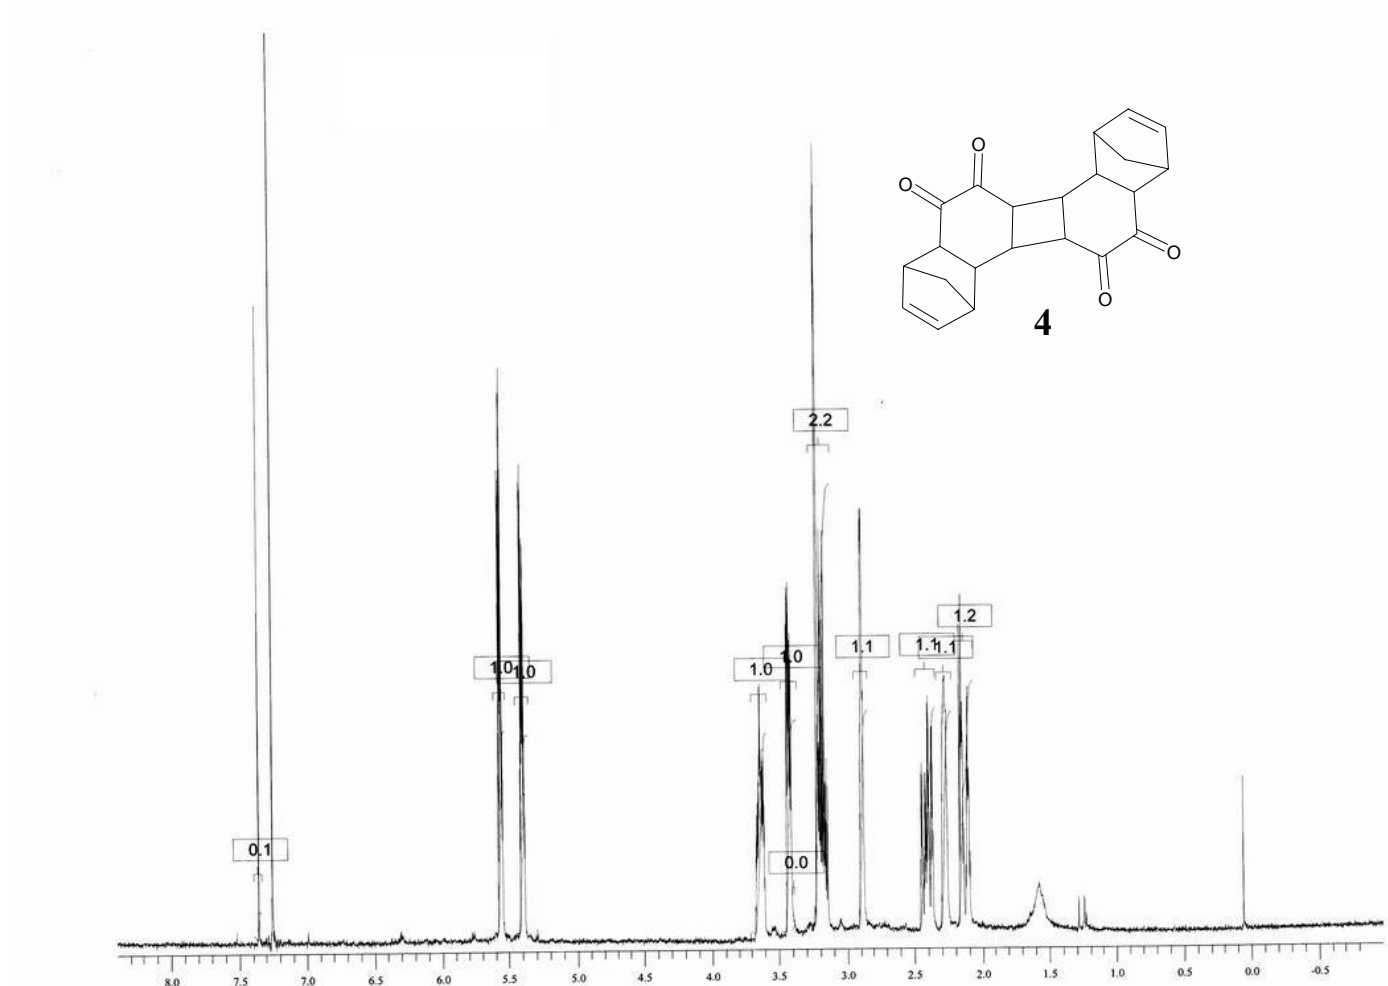

**<sup>1</sup>H NMR,  $\delta$  ppm (400 CDCl<sub>3</sub>):** 2.10 (m, 1H), 2.15 (m, 1H), 2.28 (m, 2H), 2.40 (m, 2H), 2.89 (m, 2H), 3.20 (m, 4H), 3.46 (m, 2H), 3.64 (m, 2H), 5.40 (m, 2H), 5.56 (m, 2H).

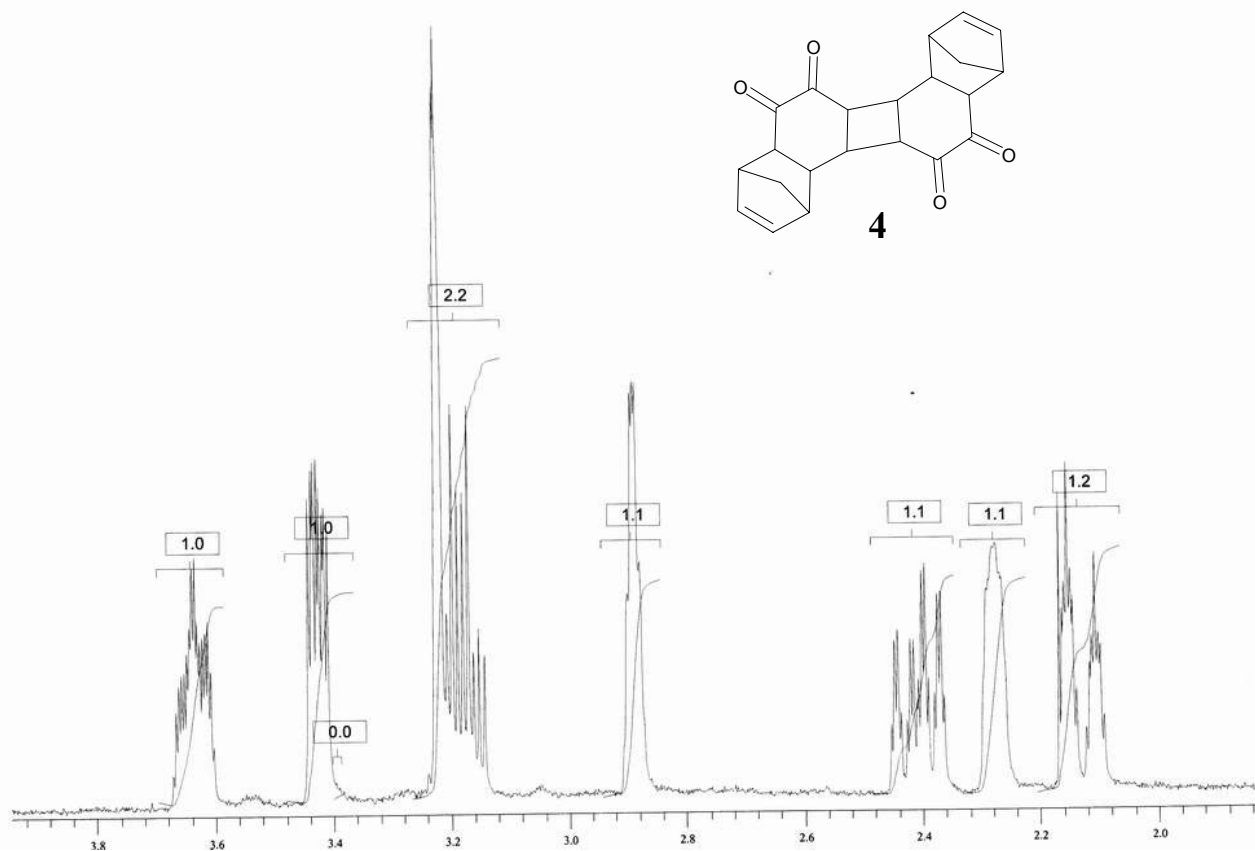

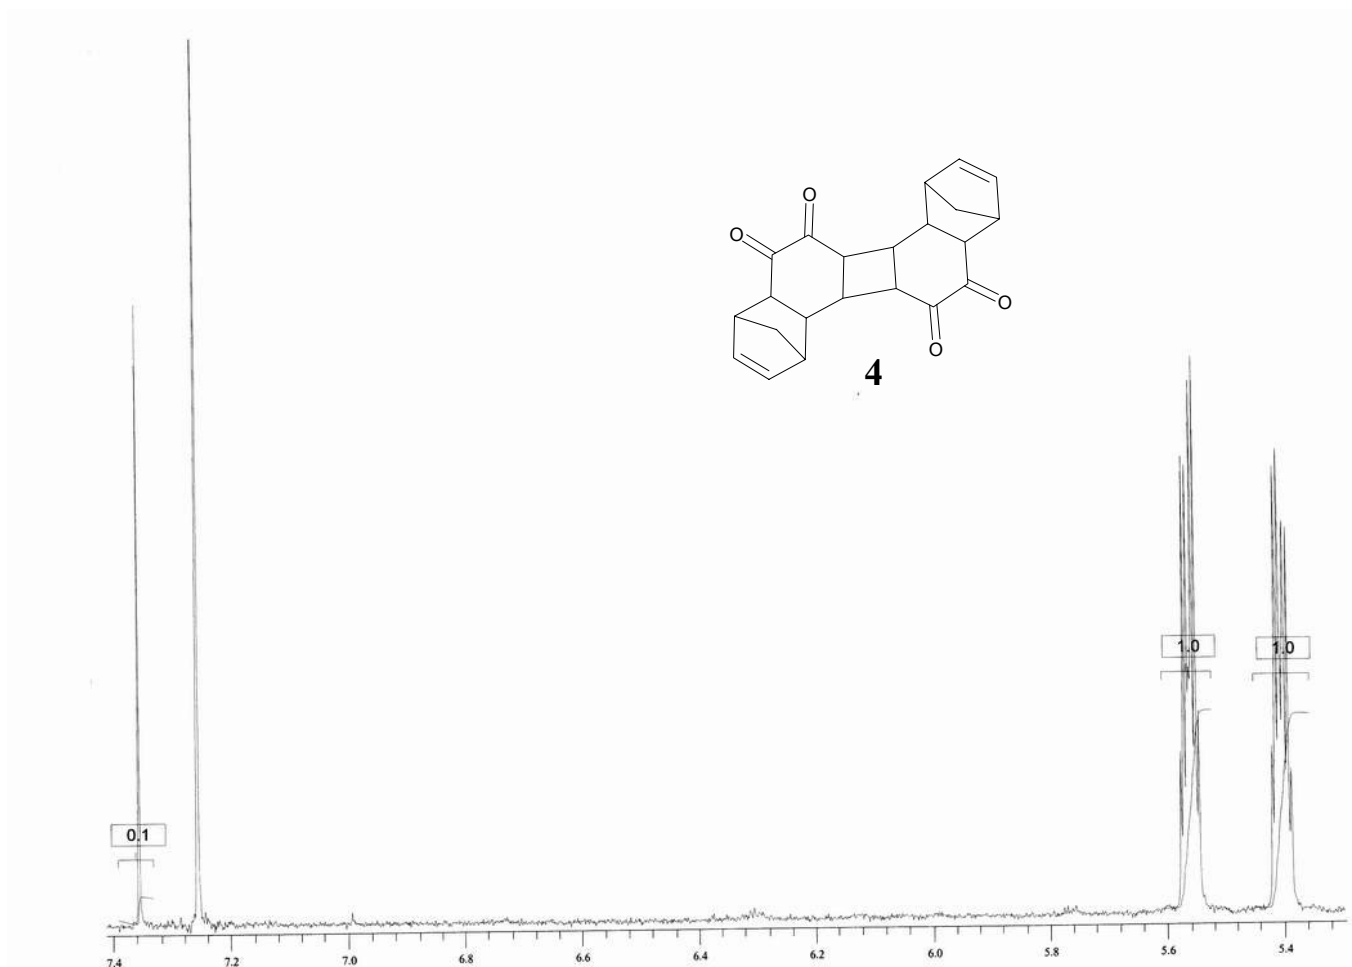

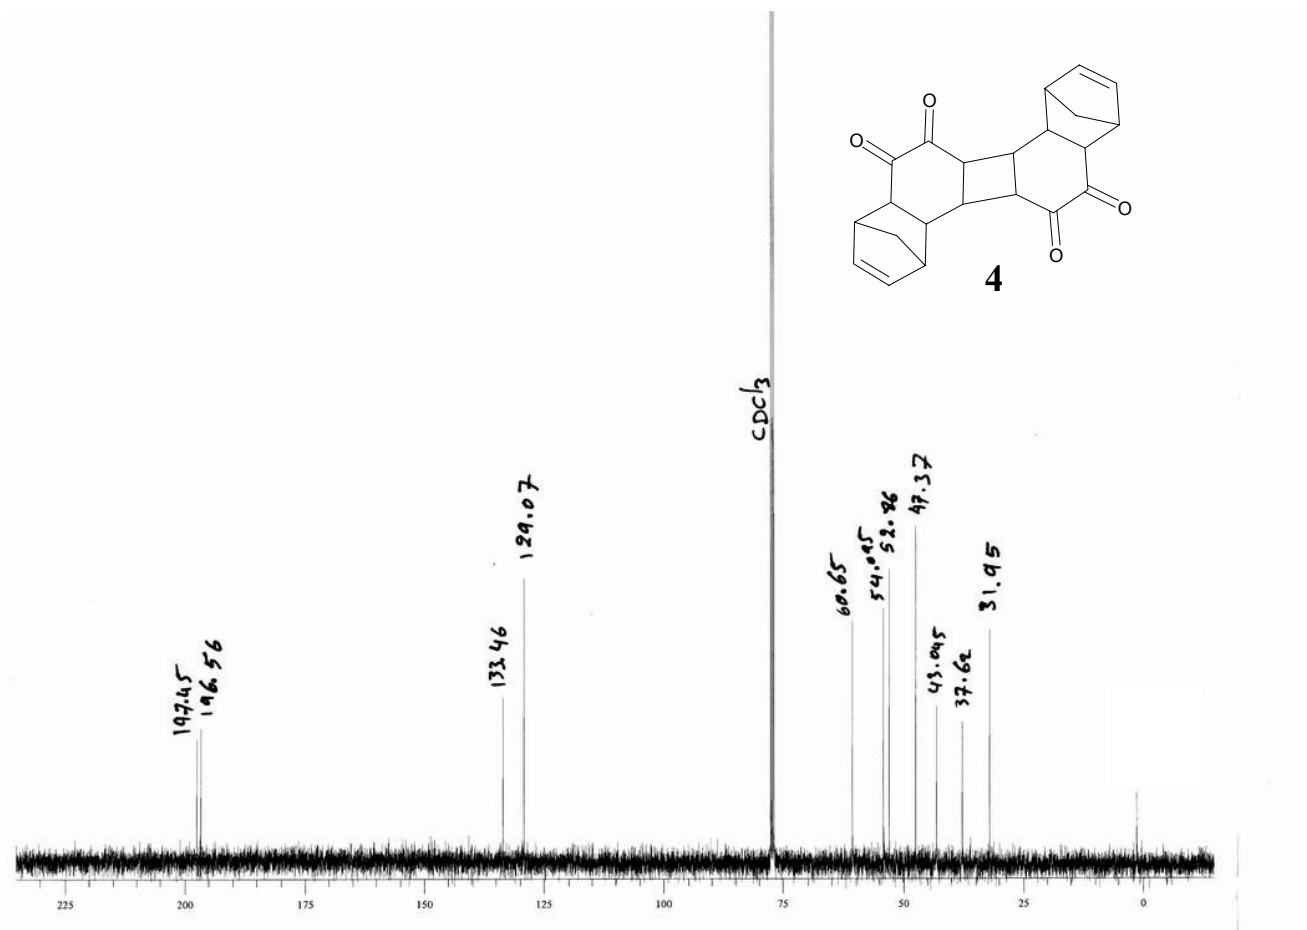

$^{13}\text{C}$  NMR,  $\delta$  ppm (400  $\text{CDCl}_3$ ): 31.9, 37.6, 43.0, 47.4, 52.9, 54.1, 60.6, 129.1, 133.5, 196.6, 197.4.

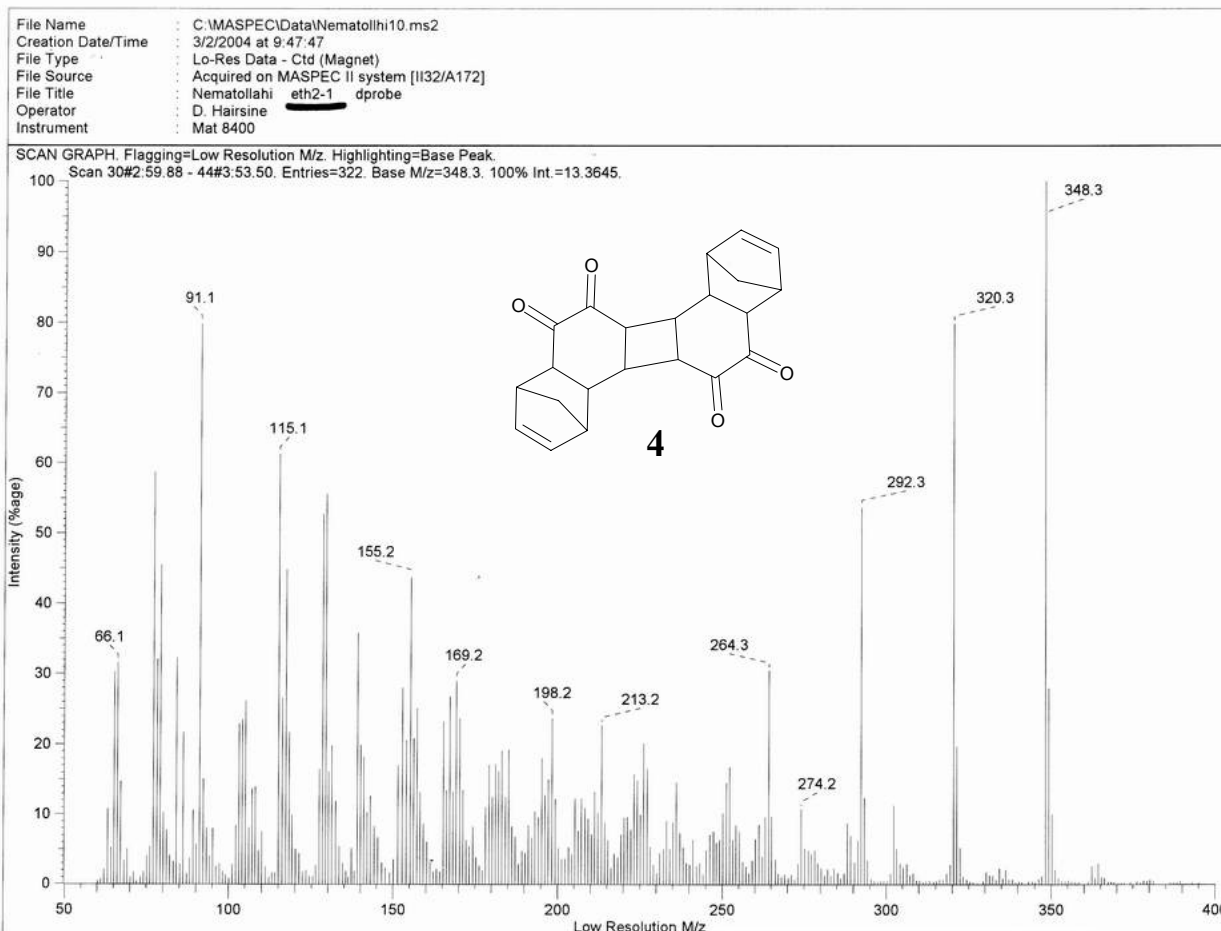

**MS (*m/z*) (relative intensity):** 348.3 (95), 320.3 (76), 292.3 (51), 264.3 (29), 213.2 (22), 198.2 (22), 169.2 (27), 155.2 (42), 115.1 (58), 91.1 (76), 66.1 (27).

File Name : C:\MASPEC\Data\Nematollahi10.ms2  
Creation Date/Time : 3/2/2004 at 9:47:47  
File Type : Lo-Res Data - Ctd (Magnet)  
File Source : Acquired on MASPEC II system [I132/A172]  
File Title : Nematollahi eth2-1 dprobe  
Operator : D. Hairsine  
Instrument : Mat 8400

SCAN GRAPH, Flagging=Low Resolution M/z. Highlighting=Base Peak.  
Scan 30#2:59.88 - 44#3:53.50. Entries=322. Base M/z=348.3. 100% Int=13.3645.

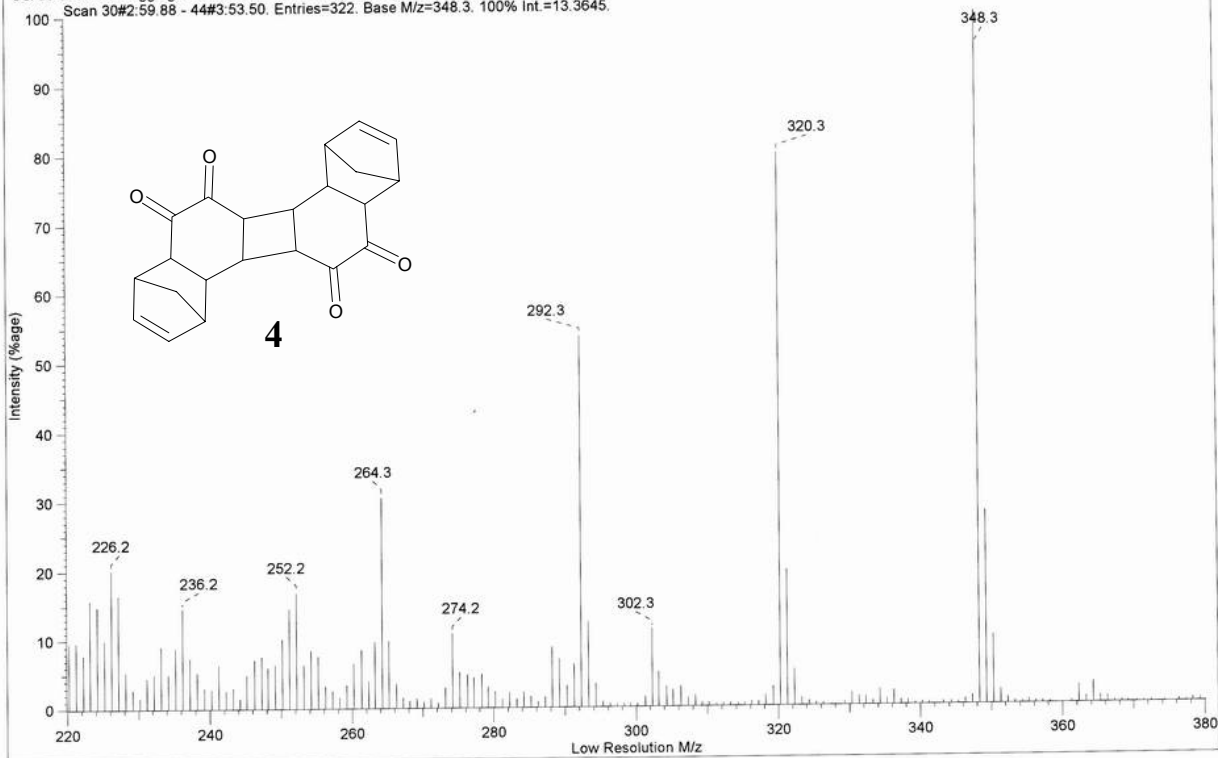

Supplement: b516814g.pdf [file b516814g.pdf]
